# Supplementary material
Source: PubMed Central journal article supplement (PMC3125476)
Supplement: NIHMS297077-supplement-1.pdf [file NIHMS297077-supplement-1.pdf]

## Supplementary Material

### Identification of common variants influencing risk of the tauopathy Progressive Supranuclear Palsy

Günter U. Höglinger, Nadine M. Melhem, Dennis W. Dickson, Patrick M.A. Sleiman, Li-San Wang, Lambertus Klei, Rosa Rademakers, Rohan de Silva, Irene Litvan, David E. Riley, John C. van Swieten, Peter Heutink, Zbigniew K. Wszolek, Ryan J. Uitti, Jana Vandrovcova, Howard I. Hurtig, Rachel G. Gross, Walter Maetzler, Stefano Goldwurm, Eduardo Tolosa, Barbara Borroni, Pau Pastor, PSP Genetics Study Group<sup>#</sup>, Laura B. Cantwell, Mi Ryung Han, Allissa Dillman, Marcel P. van der Brug, J Raphael Gibbs, Mark R. Cookson, Dena G. Hernandez, Andrew B. Singleton, Matthew J. Farrer, Chang-En Yu, Lawrence I. Golbe, Tamas Revesz, John Hardy, Andrew J. Lees, Bernie Devlin, Hakon Hakonarson, Ulrich Müller, Gerard D. Schellenberg

<sup>#</sup>PSP Genetics Study Group coauthors: Roger L. Albin, Elena Alonso, Angelo Antonini, Manuela Apfelbacher, Steven E. Arnold, Jesus Avila, Thomas G. Beach, Sherry Beecher, Daniela Berg, Thomas D. Bird, Nenad Bogdanovic, Agnita J.W. Boon, Yvette Bordelon, Alexis Brice, Herbert Budka, Margherita Canesi, Wang Zheng Chiu, Roberto Cilia, Carlo Colosimo, Peter P. De Deyn, Justo García de Yébenes, Laura Donker Kaat, Ranjan Duara, Alexandra Durr, Sebastiaan Engelborghs, Giovanni Fabbrini, NiCole A. Finch, Robyn Flook, Matthew P. Frosch, Carles Gaig, Douglas R. Galasko, Thomas Gasser, Marla Gearing, Evan T. Geller, Bernardino Ghetti, Neill R. Graff-Radford, Murray Grossman, Deborah A. Hall, Lili-Naz Hazrati, Matthias Höllerhage, Joseph Jankovic, Jorge L. Juncos, Anna Karydas, Hans A. Kretschmar, Isabelle Leber, Virginia M. Lee, Andrew P. Lieberman, Kelly E. Lyons, Claudio Mariani, Eliezer Masliah, Luke A. Massey, Catriona A. McLean, Nicoletta Meucci, Bruce L. Miller, Brit Mollenhauer, Jens C. Möller, Huw R. Morris, Chris Morris, Sean S. O'Sullivan, Wolfgang H. Oertel, Donatella Ottaviani, Alessandro Padovani, Rajesh Pahwa, Gianni Pezzoli, Stuart Pickering-Brown, Werner

Poewe, Alberto Rabano, Alex Rajput, Stephen G Reich, Gesine Respondek, Sigrun Roeber, Jonathan D. Rohrer, Owen A. Ross, Martin N. Rossor, Giorgio Sacilotto, William W. Seeley, Klaus Seppi, Laura Silveira-Moriyama, Salvatore Spina, Karin Srulijes, Peter St. George-Hyslop, Maria Stamelou, David G. Standaert, Silvana Tesei, Wallace W. Tourtellotte, Claudia Trenkwalder, Claire Troakes, John Q. Trojanowski, Juan C. Troncoso, Vivianna M. Van Deerlin, Jean Paul G. Vonsattel, Gregor K. Wenning, Charles L. White, Pia Winter, Chris Zarow, Anna L. Zecchinelli

**Supplementary Table 1.** PSP subjects with autopsy confirmation of diagnosis (Stage 1)

| <b>Source</b>                                                                          | <b>Total</b> | <b>Number Genotyped</b> | <b>Number in Analysis</b> |
|----------------------------------------------------------------------------------------|--------------|-------------------------|---------------------------|
| Ludwig-Maximilians-Universität and Brain Net Europe                                    | 21           | 21                      | 21                        |
| University of Würzburg                                                                 | 2            | 2                       | 2                         |
| Universitat de Barcelona Hospital Clínic and Banc de Teixits Neurològics               | 17           | 17                      | 16                        |
| Universidad Autónoma de Madrid                                                         | 5            | 5                       | 4                         |
| Erasmus University Medical Center                                                      | 23           | 23                      | 23                        |
| London Neurodegenerative Diseases Brain Bank                                           | 8            | 8                       | 8                         |
| University of Saskatchewan                                                             | 37           | 37                      | 35                        |
| University of Antwerp                                                                  | 2            | 2                       | 2                         |
| Australian Brain Bank Network and Flinders University                                  | 9            | 9                       | 9                         |
| University of Navarra                                                                  | 1            | 1                       | 1                         |
| Mayo Clinic College of Medicine                                                        | 588          | 538                     | 514                       |
| University of Louisville                                                               | 13           | 11                      | 11                        |
| Reta Lila Weston Institute of Neurological Studies                                     | 144          | 142                     | 141                       |
| Emory University                                                                       | 6            | 6                       | 6                         |
| McLean Brain Bank                                                                      | 64           | 63                      | 62                        |
| Indiana University School of Medicine                                                  | 31           | 30                      | 29                        |
| West Los Angeles Veterans Affairs Medical Center, University of California Los Angeles | 14           | 14                      | 14                        |
| Massachusetts General Institute for Neurodegenerative Disease Research                 | 34           | 34                      | 34                        |
| Columbia University, NY Brain Bank                                                     | 22           | 22                      | 21                        |
| Rancho Los Amigos Medical Center                                                       | 3            | 0                       | 0                         |
| Sun Health Research Institute                                                          | 38           | 38                      | 38                        |
| University of Michigan                                                                 | 23           | 22                      | 20                        |
| University of Pennsylvania                                                             | 51           | 50                      | 50                        |

**Supplementary Table 1 (continued).** PSP subjects with autopsy confirmation of diagnosis (Stage 1)

| <b>Source</b>                                   | <b>Total</b> | <b>Number Genotyped</b> | <b>Number in Analysis</b> |
|-------------------------------------------------|--------------|-------------------------|---------------------------|
| University of Washington                        | 4            | 4                       | 4                         |
| University of Southern California               | 2            | 1                       | 1                         |
| University of California San Diego              | 10           | 10                      | 10                        |
| University of Texas Southwestern Medical Center | 14           | 14                      | 12                        |
| Johns Hopkins University                        | 27           | 26                      | 26                        |
| <b>Total</b>                                    | <b>1213</b>  | <b>1150</b>             | <b>1114</b>               |

**Supplementary Table 2.** Results from Stage 1, Stage 2, and joint analysis for PSP for subjects of all ancestries

| Chr band                                                                 | SNP Location (bp)                   | MAF <sup>a</sup> Cases | MAF Controls | Gene or nearby gene | Stage 1             |                         | Stage 2             |                         | Joint P             |                          |
|--------------------------------------------------------------------------|-------------------------------------|------------------------|--------------|---------------------|---------------------|-------------------------|---------------------|-------------------------|---------------------|--------------------------|
|                                                                          |                                     |                        |              |                     | OR <sup>b</sup> /CI | P                       | OR/CI               | P                       | OR/CI               | P                        |
| <b>SNPs Significant at P &lt; 5 x 10<sup>-8</sup></b>                    |                                     |                        |              |                     |                     |                         |                     |                         |                     |                          |
| 1q25.3                                                                   | rs1411478<br>179,229,155            | 0.50                   | 0.42         | <i>STX6</i>         | 0.72<br>0.65 - 0.80 | 3.3 x 10 <sup>-10</sup> | 0.85<br>0.77 - 0.94 | 1.5 x 10 <sup>-3</sup>  | 0.79<br>0.73 - 0.84 | 3.5 x 10 <sup>-11</sup>  |
| 2p11.2                                                                   | rs7571971<br>88,676,716             | 0.32                   | 0.26         | <i>EIF2AK3</i>      | 0.76<br>0.67 - 0.85 | 1.0 x 10 <sup>-6</sup>  | 0.75<br>0.67 - 0.83 | 8.7 x 10 <sup>-8</sup>  | 0.75<br>0.70 - 0.82 | 4.2 x 10 <sup>-13</sup>  |
| 3p22.1                                                                   | rs1768208<br>39,498,257             | 0.36                   | 0.29         | <i>MOBP</i>         | 0.71<br>0.63 - 0.79 | 6.3 x 10 <sup>-10</sup> | 0.74<br>0.67 - 0.82 | 1.3 x 10 <sup>-8</sup>  | 0.73<br>0.67 - 0.78 | 5.3 x 10 <sup>-17</sup>  |
| 17q21.31                                                                 | rs8070723<br>41,436,651             | 0.05                   | 0.23         | <i>MAPT</i>         | 5.57<br>4.48 - 6.94 | 1.8 x 10 <sup>-53</sup> | 4.74<br>3.92 - 5.74 | 4.8 x 10 <sup>-67</sup> | 5.11<br>4.43 - 5.91 | 1.5 x 10 <sup>-118</sup> |
|                                                                          | rs242557<br>41,375,823              | 0.53                   | 0.35         | <i>MAPT</i>         | 0.48<br>0.43 - 0.54 | 3.1 x 10 <sup>-38</sup> | 0.54<br>0.49 - 0.59 | 5.0 x 10 <sup>-35</sup> | 0.51<br>0.48 - 0.55 | 2.7 x 10 <sup>-71</sup>  |
|                                                                          | <sup>d</sup> rs242557/<br>rs8070723 | ---                    | ---          | <i>MAPT</i>         | 0.66<br>0.59 - 0.74 | 7.5 x 10 <sup>-12</sup> | 0.74<br>0.67 - 0.83 | 6.3 x 10 <sup>-8</sup>  | 0.70<br>0.65 - 0.76 | 8.5 x 10 <sup>-18</sup>  |
| <b><sup>e</sup>SNPs with strongly suggestive evidence of association</b> |                                     |                        |              |                     |                     |                         |                     |                         |                     |                          |
| 1q41                                                                     | rs6687758<br>220,231,821            | 0.23                   | 0.19         | <i>None</i>         | 0.77<br>0.68 - 0.87 | 4.9 x 10 <sup>-5</sup>  | 0.80<br>0.71 - 0.91 | 3.0 x 10 <sup>-4</sup>  | 0.79<br>0.72 - 0.86 | 6.2 x 10 <sup>-8</sup>   |
| 10q11.21                                                                 | rs2142991<br>42,661,361             | 0.14                   | 0.17         | <i>BMS1</i>         | 1.35<br>1.16 - 1.56 | 6.1 x 10 <sup>-5</sup>  | 1.26<br>1.10 - 1.44 | 1.2 x 10 <sup>-3</sup>  | 1.30<br>1.18 - 1.44 | 3.2 x 10 <sup>-7</sup>   |
| 12p12.1                                                                  | rs11568563<br>21,348,951            | 0.08                   | 0.05         | <i>SLCO1A2</i>      | 0.66<br>0.54 - 0.81 | 7.3 x 10 <sup>-5</sup>  | 0.70<br>0.58 - 0.85 | 2.4 x 10 <sup>-4</sup>  | 0.68<br>0.59 - 0.78 | 7.0 x 10 <sup>-8</sup>   |

**Supplementary Table 2 (continued).** Results from Stage 1, Stage 2, and joint analysis for PSP for subjects of all ancestries

| Chr band                                                       | SNP Location (bp)                    | MAF <sup>a</sup> Cases | MAF Controls | Gene or nearby gene | Stage 1             |                        | Stage 2             |                               | Joint P             |                               |
|----------------------------------------------------------------|--------------------------------------|------------------------|--------------|---------------------|---------------------|------------------------|---------------------|-------------------------------|---------------------|-------------------------------|
|                                                                |                                      |                        |              |                     | OR <sup>b</sup> /CI | P                      | OR/CI               | P                             | OR/CI               | P                             |
| SNPs where allele frequencies in young and old controls differ |                                      |                        |              |                     |                     |                        |                     |                               |                     |                               |
| 2p11.2                                                         | rs6547705<br>86,898,077              | 0.18                   | 0.23         | <i>CD8B</i>         | 1.27<br>1.12 - 1.45 | 3.1 x 10 <sup>-4</sup> | 1.29<br>1.14 - 1.46 | 4.4 x 10 <sup>-5</sup>        | 1.28<br>1.17 - 1.40 | 5.2 x 10 <sup>-8</sup>        |
|                                                                | <sup>c</sup> rs6547705/<br>rs7571971 | ---                    | ---          | <i>CD8B</i>         | 1.28<br>1.13 - 1.46 | 8.5 x 10 <sup>-5</sup> | 1.29<br>1.14 - 1.46 | 4.1 x 10 <sup>-5</sup>        | 1.28<br>1.18 - 1.40 | <b>1.4 x 10<sup>-8</sup></b>  |
| 4q27                                                           | rs6852535<br>123,698,416             | 0.29                   | 0.34         | <i>IL2/IL21</i>     | 1.22<br>1.10 - 1.37 | 3.3 x 10 <sup>-4</sup> | 1.23<br>1.11 - 1.38 | 1.1 x 10 <sup>-4</sup>        | 1.23<br>1.13 - 1.32 | 1.3 x 10 <sup>-7</sup>        |
| 6p25.3                                                         | rs12203592<br>341,571                | 0.16                   | 0.19         | <i>IRF4</i>         | 1.33<br>1.16 - 1.53 | 5.5 x 10 <sup>-5</sup> | 1.63<br>1.42 - 1.87 | <b>4.7 x 10<sup>-12</sup></b> | 1.48<br>1.34 - 1.63 | <b>6.2 x 10<sup>-15</sup></b> |

<sup>a</sup>MAF, minor allele frequency; <sup>b</sup>OR based on major allele, <sup>c</sup>rs6547705 controlling for rs7571971; <sup>d</sup>rs242557 controlling for rs8070723; <sup>e</sup>5.0 ≤ |Z<sub>joint</sub>| ≤ 5.44 or 5.7 x 10<sup>-7</sup> ≤ P < 5 x 10<sup>-8</sup>

**Supplementary Table 3.** Comparison of Minor Allele Frequencies (MAF) of SNPs with significant or suggestive evidence of association with PSP, based on European PSP cases and controls and older European controls from three publicly available datasets.

| Chr band                                                                   | SNP Location (bp)                     | Gene or nearby gene | PSP cases    |              | PSP controls |              | dbGap <sup>a</sup> older controls |                     |                       |              | Weighted <sup>b</sup> MAF dbGap older controls |        |          |              |
|----------------------------------------------------------------------------|---------------------------------------|---------------------|--------------|--------------|--------------|--------------|-----------------------------------|---------------------|-----------------------|--------------|------------------------------------------------|--------|----------|--------------|
|                                                                            |                                       |                     | Stage 1      | Stage 2      | Stage 1      | Stage 2      | Health ABC <sup>c</sup>           | NIA AD <sup>d</sup> | Cataract <sup>e</sup> | Overall      | Health ABC                                     | NIA AD | Cataract | Overall      |
| <b>SNPs Significant at P&lt;5·10<sup>-8</sup></b>                          |                                       |                     |              |              |              |              |                                   |                     |                       |              |                                                |        |          |              |
| 1q25.3                                                                     | rs1411478<br>179,229,155              | <i>STX6</i>         | <b>0.496</b> | <b>0.464</b> | <b>0.418</b> | <b>0.426</b> | 0.414                             | 0.407               | 0.426                 | <b>0.416</b> | 0.404                                          | 0.395  | 0.434    | <b>0.411</b> |
| 2p11.2                                                                     | rs7571971<br>88,676,716               | <i>EIF2AK3</i>      | <b>0.314</b> | <b>0.307</b> | <b>0.257</b> | <b>0.248</b> | 0.261                             | 0.283               | 0.272                 | <b>0.270</b> | 0.265                                          | 0.285  | 0.284    | <b>0.276</b> |
| 3p22.1                                                                     | rs1768208<br>39,498,257               | <i>MOBP</i>         | <b>0.357</b> | <b>0.353</b> | <b>0.286</b> | <b>0.287</b> | 0.285                             | 0.282               | 0.275                 | <b>0.281</b> | 0.286                                          | 0.275  | 0.275    | <b>0.280</b> |
| 17q21.31                                                                   | rs8070723<br>41,436,651               | <i>MAPT</i>         | <b>0.051</b> | <b>0.060</b> | <b>0.235</b> | <b>0.232</b> | 0.231                             | 0.230               | 0.210                 | <b>0.224</b> | 0.232                                          | 0.234  | 0.211    | <b>0.223</b> |
|                                                                            | rs242557<br>41,375,823                |                     | <b>0.530</b> | <b>0.495</b> | <b>0.348</b> | <b>0.355</b> | 0.350                             | 0.369               | 0.359                 | <b>0.358</b> | 0.352                                          | 0.362  | 0.359    | <b>0.357</b> |
| <b><sup>f</sup>SNPs with strongly suggestive evidence of association</b>   |                                       |                     |              |              |              |              |                                   |                     |                       |              |                                                |        |          |              |
| 1q41                                                                       | rs6687758<br>220,231,821              | <i>None</i>         | <b>0.229</b> | <b>0.227</b> | <b>0.189</b> | <b>0.191</b> | 0.211                             | 0.200               | 0.196                 | <b>0.204</b> | 0.211                                          | 0.200  | 0.194    | <b>0.203</b> |
| 10q11.21                                                                   | rs2142991<br>42,661,361               | <i>BMS1</i>         | <b>0.139</b> | <b>0.139</b> | <b>0.173</b> | <b>0.169</b> | 0.176                             | 0.155               | 0.163                 | <b>0.167</b> | 0.178                                          | 0.152  | 0.170    | <b>0.169</b> |
| 12p12.1                                                                    | rs11568563<br>21,348,951              | <i>SLCO1A2</i>      | <b>0.078</b> | <b>0.077</b> | <b>0.053</b> | <b>0.055</b> | 0.060                             | 0.059               | 0.058                 | <b>0.059</b> | 0.068                                          | 0.062  | 0.057    | <b>0.063</b> |
| <b>SNPs where allele frequencies differ between young and old controls</b> |                                       |                     |              |              |              |              |                                   |                     |                       |              |                                                |        |          |              |
| 2p11.2                                                                     | rs6547705 <sup>g</sup><br>86,898,077  | <i>CD8B</i>         | <b>0.187</b> | <b>0.187</b> | <b>0.229</b> | <b>0.230</b> | 0.209                             | 0.194               | 0.218                 | <b>0.208</b> | 0.201                                          | 0.193  | 0.215    | <b>0.203</b> |
| 4q27                                                                       | rs6852535 <sup>g</sup><br>123,698,416 | <i>IL2/IL21</i>     | <b>0.289</b> | <b>0.277</b> | <b>0.338</b> | <b>0.322</b> | 0.316                             | 0.279               | 0.292                 | <b>0.299</b> | 0.308                                          | 0.277  | 0.294    | <b>0.296</b> |
| 6p25.3                                                                     | rs12203592 <sup>g</sup><br>341,571    | <i>IRF4</i>         | <b>0.164</b> | <b>0.131</b> | <b>0.200</b> | <b>0.198</b> | 0.200                             | 0.164               | 0.120                 | <b>0.166</b> | 0.206                                          | 0.176  | 0.125    | <b>0.172</b> |
| 6p25.3                                                                     | rs2493013 <sup>h</sup><br>461,660     | <i>EXOC2</i>        | <b>0.228</b> | <b>0.251</b> | <b>0.203</b> | <b>0.209</b> | 0.202                             | 0.200               | 0.233                 | <b>0.211</b> | 0.202                                          | 0.205  | 0.231    | <b>0.212</b> |

<sup>a</sup>The datasets used for the analyses described were obtained from Database for Genotypes and Phenotypes (dbGap) at <http://www.ncbi.nlm.nih.gov/gap>. A total of 3,816 controls from three studies were included. <sup>b</sup>Allele frequencies in dbGap controls weighted by ancestry representation of the PSP controls. <sup>c</sup>Whole Genome Association Study of Visceral Adiposity in the Health Aging and Body Composition (Health ABC) Study (Study accession number: phs000169.v1.p1); <sup>d</sup>National Institute on Aging - Late Onset Alzheimer's Disease Family Study: Genome-Wide Association Study for Susceptibility Loci (Study accession number: phs000168.v1.p1), General Research Use and Non-Profit only consent groups; <sup>e</sup>A Genome-Wide Association Study on Cataract and HDL in the Personalized Medicine Research Project Cohort (Study accession number: phs000170.v1.p1); <sup>f</sup> $5.0 \leq |Z_{\text{joint}}| \leq 5.44$  or  $5.7 \times 10^{-7} \leq P < 5 \times 10^{-8}$ ; <sup>g</sup>rs12203592, rs6547705, and rs6852535 had significantly different allele frequencies between PSP controls and dbGap older controls; <sup>h</sup>rs2493013 approached threshold for strongly suggestive evidence ( $Z_{\text{joint}} = -4.99$ ,  $p = 6.0 \times 10^{-7}$ ) and had significantly different allele frequencies between PSP controls and Cataract controls.



**Supplementary Table 4.** Clinical and autopsy-documented PSP subjects used in Stage 2

| <b>Source</b>                                                                                  | <b>Total</b><br>n (autopsied) | <b>Genotyped</b><br>n (autopsied) | <b>Analysis</b><br>n (autopsied) |
|------------------------------------------------------------------------------------------------|-------------------------------|-----------------------------------|----------------------------------|
| University of Pennsylvania                                                                     | 25 (10)                       | 25 (10)                           | 23 (8)                           |
| Reta Lila Weston Institute of Neurological Studies                                             | 138                           | 108                               | 11                               |
| UCL Institute of Neurology                                                                     | 7                             | 7                                 | 7                                |
| University of Brescia                                                                          | 64                            | 58                                | 58                               |
| Parkinson Institute, Istituti Clinici di Perfezionamento                                       | 78                            | 76                                | 75                               |
| Erasmus University Medical Center                                                              | 199                           | 184                               | 183                              |
| Philipps-Universität                                                                           | 41                            | 41                                | 41                               |
| University of Toronto                                                                          | 11 (11)                       | 11 (11)                           | 6 (6)                            |
| Mayo Clinic College of Medicine                                                                | 199 (105)                     | 187 (94)                          | 171 (89)                         |
| University of Louisville                                                                       | 226 (2)                       | 210 (2)                           | 195 (1)                          |
| Newcastle University                                                                           | 6 (6)                         | 6 (6)                             | 5 (5)                            |
| Cardiff University, Royal Gwent Hospital                                                       | 20                            | 19                                | 19                               |
| University of Manchester                                                                       | 17                            | 17                                | 16                               |
| Hertie-Institute for Clinical Brain Research, and German Center for Neurodegenerative Diseases | 92                            | 92                                | 92                               |
| Hôpital Pitié-Salpêtrière                                                                      | 55                            | 44                                | 28                               |
| Georg-August University and Paracelsus-Elena Hospital                                          | 19                            | 17                                | 12                               |
| Universitat de Barcelona Hospital Clínic and Banc de Teixits Neurològics                       | 43                            | 42                                | 41                               |

**Supplementary Table 4 (continued).** Clinical and autopsy-documented PSP subjects used in Stage 2

| <b>Source</b>                           | <b>Total</b><br>n (autopsied) | <b>Genotyped</b><br>n (autopsied) | <b>Analysis</b><br>n (autopsied) |
|-----------------------------------------|-------------------------------|-----------------------------------|----------------------------------|
| University of Navarra                   | 66                            | 57                                | 28                               |
| Sapienza Università di Roma             | 9                             | 9                                 | 8                                |
| University of California San Francisco  | 23 (8)                        | 21 (8)                            | 20 (8)                           |
| Innsbruck Medical University            | 13                            | 13                                | 12                               |
| Universidad Autónoma de Madrid<br>Spain | 3 (3)                         | 0                                 | 0                                |
| <b>Totals</b>                           | 1354 (142)                    | 1244 (131)                        | 1051 (117)                       |

**Supplementary Table 5.** Results for SNPs significant even after controlling for most significant SNP in the region (European Ancestry)

| Chr band                 | SNP Location (bp)                      | MAF Cases | MAF Controls | Gene or nearby gene | Stage 1                |                         | Stage 2                |                        | Joint P                |                         |
|--------------------------|----------------------------------------|-----------|--------------|---------------------|------------------------|-------------------------|------------------------|------------------------|------------------------|-------------------------|
|                          |                                        |           |              |                     | OR / CI                | P                       | OR / CI                | P                      | OR/CI                  | P                       |
| 2p11.2                   | rs6547705 <sup>a</sup> /<br>rs7571971  | 0.19      | 0.23         | <i>CD8B</i>         | 1.26<br>1.10 - 1.43    | 8.8 x 10 <sup>-4</sup>  | 1.29<br>1.14 - 1.46    | 4.1 x 10 <sup>-5</sup> | 1.28<br>1.16 - 1.40    | 1.4 x 10 <sup>-7</sup>  |
| 6p25.3                   | rs2493013 <sup>b</sup><br>461,600      | 0.23      | 0.20         | <i>EXOC2</i>        | 0.83<br>0.73 - 0.89    | 3.1 x 10 <sup>-3</sup>  | 0.79<br>0.71 - 0.89    | 5.4 x 10 <sup>-5</sup> | 0.81<br>0.74 - 0.88    | 6.0 x 10 <sup>-7</sup>  |
|                          | rs2493013 <sup>c</sup> /<br>rs12203592 | ----      | ----         |                     | 0.85<br>0.76 - 0.97    | 3.1 x 10 <sup>-2</sup>  | 0.83<br>0.74 - 0.93    | 1.0 x 10 <sup>-3</sup> | 0.84<br>0.77 - 0.91    | 5.3 x 10 <sup>-5</sup>  |
| 17q21.3 <sup>d</sup>     | rs11869096<br>41,300,889               | 0.57      | 0.43         | <i>LOC100128977</i> | 0.79<br>0.70 - 0.89    | 9.5 x 10 <sup>-5</sup>  | 0.80<br>0.72 - 0.89    | 5.8 x 10 <sup>-5</sup> | 0.80<br>0.73 - 0.86    | 2.1 x 10 <sup>-8</sup>  |
|                          | rs11867549<br>41,369,064               | 0.39      | 0.24         | <i>MAPT</i>         | 0.69<br>0.61 - 0.78    | 2.7 x 10 <sup>-9</sup>  | 0.75<br>0.68 - 0.84    | 2.5 x 10 <sup>-7</sup> | 0.72<br>0.66 - 0.78    | 4.7 x 10 <sup>-15</sup> |
|                          | <b>rs242557</b><br><b>41,375,573</b>   | 0.53      | 0.35         |                     | 0.66<br>0.58 - 0.74    | 1.3 x 10 <sup>-11</sup> | 0.74<br>0.67 - 0.83    | 6.3 x 10 <sup>-8</sup> | 0.70<br>0.65 - 0.76    | 9.5 x 10 <sup>-18</sup> |
|                          | rs2435211<br>41,419,081                | 0.42      | 0.29         |                     | 0.79<br>0.70 - 0.90    | 2.1 x 10 <sup>-4</sup>  | 0.91<br>0.81 - 1.01    | 7.5 x 10 <sup>-2</sup> | 0.85<br>0.78 - 0.92    | 1.3 x 10 <sup>-4</sup>  |
|                          | rs6503454<br>41,474,116                | 0.25      | 0.15         | <i>KIAA1267</i>     | 0.71<br>0.62 - 0.82    | 2.6 x 10 <sup>-6</sup>  | 0.80<br>0.71 - 0.91    | 5.2 x 10 <sup>-4</sup> | 0.76<br>0.69 - 0.83    | 8.9 x 10 <sup>-9</sup>  |
|                          | rs7225002<br>41,544,850                | 0.32      | 0.41         |                     | 0.75<br>0.66-0.86      | 4.8 x 10 <sup>-5</sup>  | 0.83<br>0.73 - 0.93    | 1.8 x 10 <sup>-3</sup> | 0.79<br>0.72 - 0.86    | 4.2 x 10 <sup>-7</sup>  |
|                          | rs2016730<br>41,560,151                | 0.26      | 0.17         |                     | 0.75<br>0.65 - 0.86    | 2.9 x 10 <sup>-5</sup>  | 0.75<br>0.66 - 0.84    | 3.0 x 10 <sup>-6</sup> | 0.75<br>0.68 - 0.82    | 3.7 x 10 <sup>-10</sup> |
|                          | rs4792831<br>41,562,443                | 0.26      | 0.17         |                     | 0.75<br>0.65 - 0.86    | 4.2 x 10 <sup>-5</sup>  | 0.80<br>0.70 - 0.90    | 2.6 x 10 <sup>-4</sup> | 0.78<br>0.71 - 0.85    | 4.6 x 10 <sup>-8</sup>  |
|                          | rs17692129<br>42,148,466               | 0.44      | 0.31         | <i>NSF</i>          | 0.75<br>0.66 - 0.85    | 2.5 x 10 <sup>-6</sup>  | 0.86<br>0.77 - 0.96    | 5.8 x 10 <sup>-3</sup> | 0.80<br>0.74 - 0.87    | 1.6 x 10 <sup>-7</sup>  |
| rs11650531<br>42,229,159 | 0.33                                   | 0.26      | <i>WNT3</i>  | 0.79<br>0.70 - 0.89 | 1.4 x 10 <sup>-4</sup> | 0.90<br>0.80 - 1.00     | 5.9 x 10 <sup>-2</sup> | 0.84<br>0.78 - 0.92    | 6.8 x 10 <sup>-5</sup> |                         |

<sup>a</sup>rs6547705 controlling for rs7571971, the most significant SNP in the 2p11.2 region; <sup>b</sup>rs2493013, main effect only; <sup>c</sup>rs2493013 controlling for rs12203592, the most significant SNP in the 6p25.3 region; <sup>d</sup>SNPs controlling for rs8070723; P<1·10<sup>-3</sup> was used for significance of SNPs when controlling for other SNP

**Supplementary Table 6.** Results from Stage 1, Stage 2, and joint analysis for subjects of European ancestry: SNPs with suggestive evidence of association

| Chr band | SNP Location (bp)        | Gene or nearby gene | Stage 1                |              |                     |                        | Stage 2                |              |                   |                        | Joint P           |                        |
|----------|--------------------------|---------------------|------------------------|--------------|---------------------|------------------------|------------------------|--------------|-------------------|------------------------|-------------------|------------------------|
|          |                          |                     | MAF <sup>a</sup> Cases | MAF Controls | OR <sup>b</sup> /CI | P                      | MAF <sup>a</sup> Cases | MAF Controls | OR/CI             | P                      | OR/CI             | P                      |
| 1q41     | rs6687758<br>220,231,821 | <i>None</i>         | 0.23                   | 0.19         | 0.79<br>0.69 - 0.89 | 2.3 x 10 <sup>-4</sup> | 0.23                   | 0.19         | 0.8<br>0.71-0.91  | 3.1 x 10 <sup>-4</sup> | 0.80<br>0.73-0.87 | 2.8 x 10 <sup>-7</sup> |
| 10q11.21 | rs2142991<br>42,661,361  | <i>BMS1</i>         | 0.14                   | 0.17         | 1.35<br>1.16 - 1.56 | 8.6 x 10 <sup>-5</sup> | 0.14                   | 0.17         | 1.26<br>1.10-1.44 | 1.2 x 10 <sup>-3</sup> | 1.30<br>1.17-1.44 | 4.9 x 10 <sup>-7</sup> |
| 12p12.1  | rs11568563<br>21,348,951 | <i>SLCO1A2</i>      | 0.08                   | 0.05         | 0.67<br>0.55 - 0.83 | 2.1 x 10 <sup>-4</sup> | 0.08                   | 0.06         | 0.7<br>0.58-0.85  | 2.4 x 10 <sup>-4</sup> | 0.69<br>0.60-0.79 | 1.9 x 10 <sup>-7</sup> |

<sup>a</sup>MAF, minor allele frequency; <sup>b</sup>OR based on major allele

**Abbreviations and gene symbols:** *SLCO1A2*, solute carrier organic anion transporter family member 1a2; *BMS1*; BMS1-like, ribosome assembly protein; A summary of the function of each gene listed is in Supplementary Table 4.

**Supplementary Table 8.** Overlap between PSP GWAS results and those for AD and PD

| GWAS | CHR       | SNP        | Gene         | Nearby HapMap SNP with LD info | LD Region: r-squared>=0.3 |             | PSP Stage 1 |           | PSP Stage 2 |           | PSP Stage 1+2           |          |                         |
|------|-----------|------------|--------------|--------------------------------|---------------------------|-------------|-------------|-----------|-------------|-----------|-------------------------|----------|-------------------------|
|      |           |            |              |                                | START                     | END         | Top SNP     | P         | Top SNP     | P         | Top SNP                 | P        | Gene                    |
| AD   | 1         | rs3818361  | CR1          | -                              | 205,720,018               | 205,873,612 | none        | -         | none        | -         | none                    | -        | -                       |
|      | 1         | rs6701713  | CR1          | -                              | 205,720,018               | 205,873,612 | none        | -         | none        | -         | none                    | -        | -                       |
|      | 2         | rs7561528  | BIN1         | -                              | 127,560,126               | 127,611,085 | none        | -         | none        | -         | none                    | -        | -                       |
|      | 2         | rs744373   | BIN1         | -                              | 127,556,004               | 127,611,085 | none        | -         | none        | -         | none                    | -        | -                       |
|      | 6         | rs9349407  | CD2AP        | -                              | 47,502,755                | 47,561,337  | none        | -         | none        | -         | none                    | -        | -                       |
|      | 7         | rs11767557 | EPHA1        | -                              | 142,809,229               | 142,819,261 | none        | -         | none        | -         | none                    | -        | -                       |
|      | 8         | rs1532278  | CLU          | -                              | 27,512,170                | 27,582,264  | rs520769    | 0.00201   | rs520769    | 0.0489    | rs520769                | 0.000384 | 2Kbp upstream of SCARA3 |
|      | 10        | rs2588969  | ARID5B       | -                              | 63,227,654                | 63,307,282  | none        | -         | none        | -         | none                    | -        | -                       |
|      | 11        | rs610932   | MS4A6A       | -                              | 59,583,253                | 59,856,488  | none        | -         | none        | -         | none                    | -        | -                       |
|      | 11        | rs670139   | MS4A4E       | -                              | 59,570,863                | 59,856,488  | none        | -         | none        | -         | none                    | -        | -                       |
|      | 11        | rs4938933  | MS4A4A       | -                              | 59,593,673                | 59,791,005  | none        | -         | none        | -         | none                    | -        | -                       |
|      | 11        | rs561655   | PICALM       | -                              | 85,312,382                | 85,548,832  | none        | -         | rs713346    | 0.069     | rs10792820              | 0.076    | PICALM                  |
|      | 19        | rs3764650  | ABCA7        | -                              | 992,352                   | 1,007,492   | none        | -         | none        | -         | none                    | -        | -                       |
|      | 19        | rs3752246  | ABCA7        | -                              | 997,520                   | 1,032,617   | none        | -         | none        | -         | none                    | -        | -                       |
| 19   | rs4420638 | APOE       | -            | 50,084,094                     | 50,114,786                | rs2075650   | 0.0034      | rs2075650 | 0.00121     | rs2075650 | 1.25 x 10 <sup>-5</sup> | TOMM40   |                         |
| 19   | rs3865444 | CD33       | -            | 56,396,851                     | 56,429,803                | none        | -           | none      | -           | none      | -                       | -        |                         |
| PD   | 1         | -          | SYT11        | rs822519                       | 154,107,330               | 154,279,135 | none        | -         | none        | -         | none                    | -        | -                       |
|      | 2         | rs6710823  | ACMSD        | rs12614226                     | 135,154,655               | 135,329,387 | none        | -         | none        | -         | none                    | -        | -                       |
|      | 2         | rs2102808  | STK39        | rs1850437                      | 168,798,166               | 168,873,722 | none        | -         | none        | -         | none                    | -        | -                       |
|      | 3         | rs11711441 | MCCC1, LAMP3 | rs11710342                     | 184,211,987               | 184,344,424 | none        | -         | none        | -         | none                    | -        | -                       |

**Supplementary Table 8 (continued).** Overlap between PSP GWAS results and those for AD and PD

| GWAS | CHR | SNP        | Gene          | Nearby HapMap SNP with LD info | LD Region: $r^2 \geq 0.3$ |             | PSP Stage 1 |                        | PSP Stage 2 |                        | PSP Stage 1+2 |                         |      |
|------|-----|------------|---------------|--------------------------------|---------------------------|-------------|-------------|------------------------|-------------|------------------------|---------------|-------------------------|------|
|      |     |            |               |                                | START                     | END         | Top SNP     | P                      | Top SNP     | P                      | Top SNP       | P                       | Gene |
| PD   | 4   | -          | GAK           | rs6822424                      | 804,080                   | 950,081     | none        | -                      | none        | -                      | none          | -                       | -    |
|      | 4   | rs11724635 | BST1          | -                              | 15,205,551                | 15,354,852  | none        | -                      | none        | -                      | none          | -                       | -    |
|      | 4   | rs356219   | SNCA          | -                              | 90,825,620                | 91,038,809  | none        | -                      | none        | -                      | none          | -                       | -    |
|      | 6   | -          | HLA-DRB5      | rs35847514                     | 32,395,097                | 32,765,894  | none        | -                      | none        | -                      | none          | -                       | -    |
|      | 12  | rs1491942  | LRRK2         | -                              | 38,707,384                | 38,931,863  | none        | -                      | none        | -                      | none          | -                       | -    |
|      | 12  | rs12817488 | CCDC62, HIP1R | rs7957643                      | 121,779,189               | 121,951,396 | none        | -                      | none        | -                      | none          | -                       | -    |
|      | 17  | rs2942168  | MAPT          | -                              | 40,872,185                | 41,268,567  | rs7215239   | $3.31 \times 10^{-51}$ | rs393152    | $8.28 \times 10^{-71}$ | rs393152      | $1.41 \times 10^{-120}$ | MAPT |

Overlap between GWAS signals PSP and for Parkinson's disease<sup>1</sup> and AD<sup>2-6</sup>. SNPs used were from published reports (for PD, Table 2 from the International Parkinson Disease Consortium<sup>1</sup>; for AD, Table 1 from Hollingworth et al.<sup>6</sup>). For each AD or PD signal, LD regions surrounding the peak SNP were determined using the HapMap Release 27 CEU panel ([http://hapmap.ncbi.nlm.nih.gov/downloads/ld\\_data/2009-04\\_rel27/](http://hapmap.ncbi.nlm.nih.gov/downloads/ld_data/2009-04_rel27/)) by finding the farthest flanking SNPs with  $r^2 \geq 0.3$ ; if no LD information for the top SNP is available, the nearest SNP from HapMap is used. SNPs within the LD regions for either PD or AD loci, with the best p-values ( $p < 0.1$ ) in the PSP dataset are listed. None indicates that there were no SNPs from the PSP GWAS with  $P < 0.01$ . At the CLU locus, while rs520769 exhibits the smallest p-value in the region, it is not correlated with rs1532278 ( $r^2 = 0.06$ ), which is associated with risk for PD; another SNP genotyped in the PSP sample, rs1113600, is highly correlated ( $r^2 = 0.96$ ) but its alleles show no association with PSP risk. The SNPs in the MAPT locus are all highly correlated ( $r^2 \geq 0.94$ ). Correlation structure for the APOE locus is described in the body of the manuscript. All physical positions are from the Human Reference Genome Release 36.

**Supplementary Table 9.** PSP gene abbreviations and functions

| Gene           |                                                            | Function                                                                                                          |
|----------------|------------------------------------------------------------|-------------------------------------------------------------------------------------------------------------------|
| Abbreviation   | Name                                                       |                                                                                                                   |
| <i>BMS1</i>    |                                                            | Ribosome assembly protein                                                                                         |
| <i>EIF2AK3</i> | Eukaryotic translation initiation factor 2-alpha kinase 3  | Inhibits translation initiation upon accumulation of mis-folded proteins in the endoplasmic reticulum (ER-stress) |
| <i>MAPT</i>    | Microtubule associated protein tau                         | Stabilizes microtubules                                                                                           |
| <i>MOBP</i>    | Myelin-Associated Oligodendrocytic Basic Protein           | Abundant myelin constituent expressed exclusively by oligodendrocytes                                             |
| <i>SLC01A2</i> | Solute carrier organic anion transporter family member 1a2 | Sodium-independent transporter expressed in the apical blood-brain barrier                                        |
| <i>STX6</i>    | Syntaxin 6                                                 | Vesicle membrane fusion, Golgi-endosomes                                                                          |

**Supplementary Table 10.** Results of loci significant at  $P < 5 \cdot 10^{-8}$  at Stage 1, Stage 2, or joint analysis for PSP after controlling for H1/H2 inversion among subjects of European ancestry

| Chr band | SNP Location (bp)        | Gene or nearby gene | Stage 1             |                      | Stage 2             |                       | Joint P             |                       |
|----------|--------------------------|---------------------|---------------------|----------------------|---------------------|-----------------------|---------------------|-----------------------|
|          |                          |                     | OR/CI               | P                    | OR/CI               | P                     | OR/CI               | P                     |
| 1q25.3   | rs1411478<br>179,229,155 | <i>STX6</i>         | 0.77<br>0.68 - 0.86 | $3.1 \times 10^{-6}$ | 0.85<br>0.77 - 0.94 | $2.2 \times 10^{-3}$  | 0.81<br>0.75 - 0.87 | $5.8 \times 10^{-8}$  |
| 2p11.2   | rs7571971<br>88,676,716  | <i>EIF2AK3</i>      | 0.75<br>0.67 - 0.86 | $1.1 \times 10^{-5}$ | 0.76<br>0.68 - 0.85 | $1.5 \times 10^{-6}$  | 0.76<br>0.69 - 0.82 | $7.0 \times 10^{-11}$ |
| 3p22.1   | rs1768208<br>39,498,257  | <i>MOBP</i>         | 0.71<br>0.63 - 0.80 | $2.9 \times 10^{-8}$ | 0.72<br>0.65 - 0.81 | $4.1 \times 10^{-9}$  | 0.72<br>0.66 - 0.78 | $6.2 \times 10^{-16}$ |
| 6p25.3   | rs12203592<br>341,571    | <i>IRF4</i>         | 1.34<br>1.15 - 1.57 | $1.6 \times 10^{-4}$ | 1.64<br>1.42-1.89   | $1.4 \times 10^{-11}$ | 1.49<br>1.33 - 1.65 | $6.1 \times 10^{-14}$ |



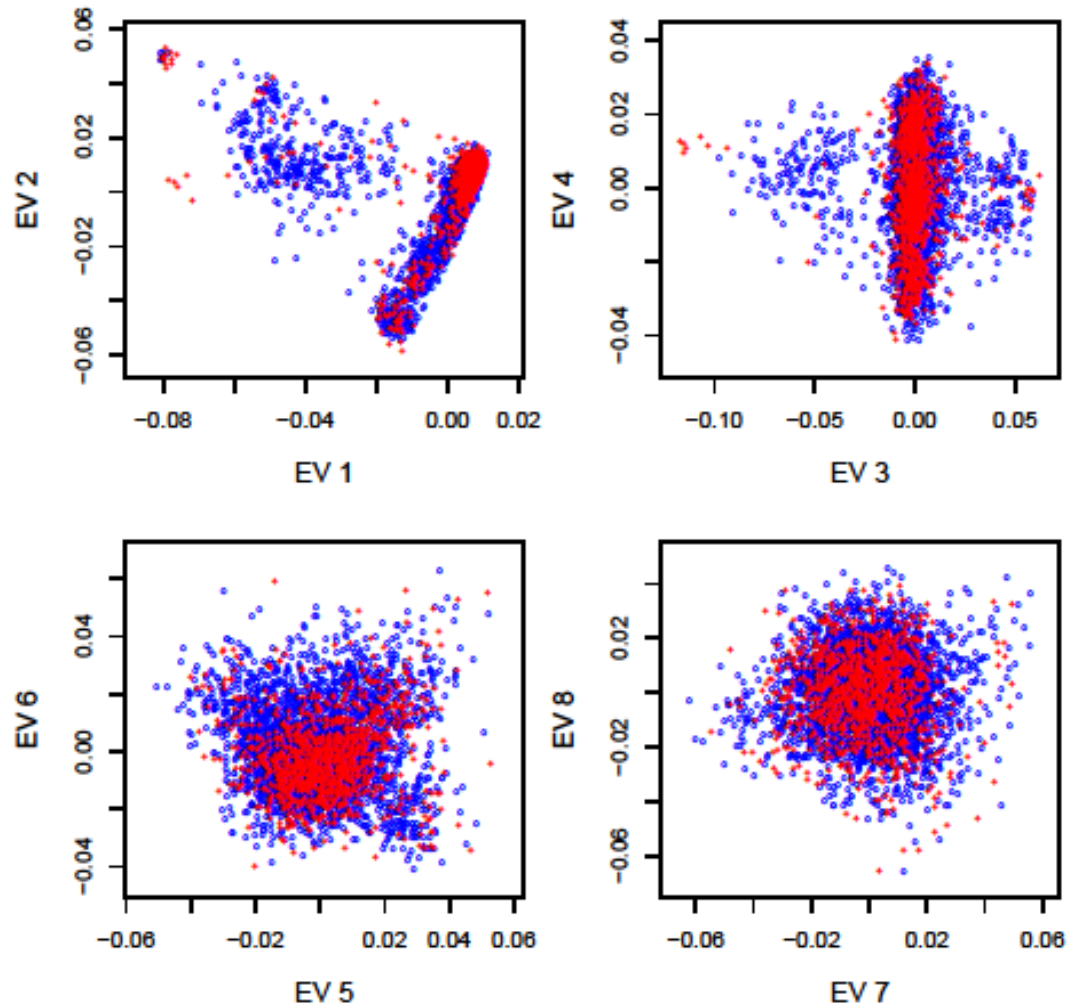

**Supplementary Figure 1.** Results from genetic ancestry analysis. SpectralGem was used to convert multilocus genotypes to ancestry dimension, expressed as eigenvectors. The decomposition resulted in an 8 dimensional space, of which only certain combinations of dimensions are shown here. Red symbols are cases, blue symbols are controls.

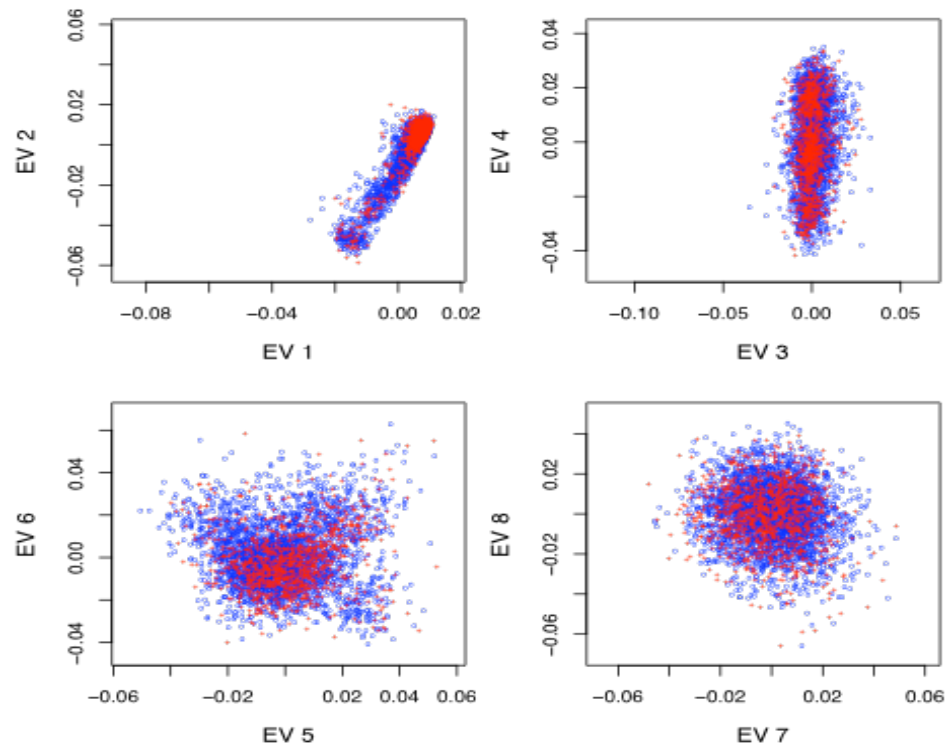

**Supplementary Figure 2.** Results from genetic ancestry analysis of subjects of European ancestry only. Red symbols are cases, blue symbols are controls.

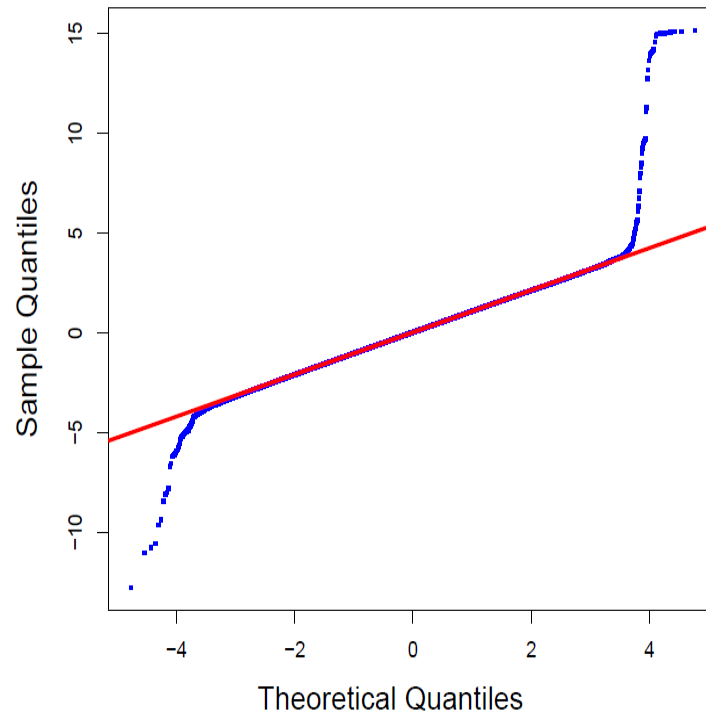

**Supplementary Figure 3.** Quantile-Quantile or Q-Q plot of association test statistics for subjects of European ancestry. Genomic inflation factor  $\lambda=1.11$ . If there were no difference between the observed distribution and that expected under the null hypothesis of no association, all points would fall on the line ( $X=Y$ ).

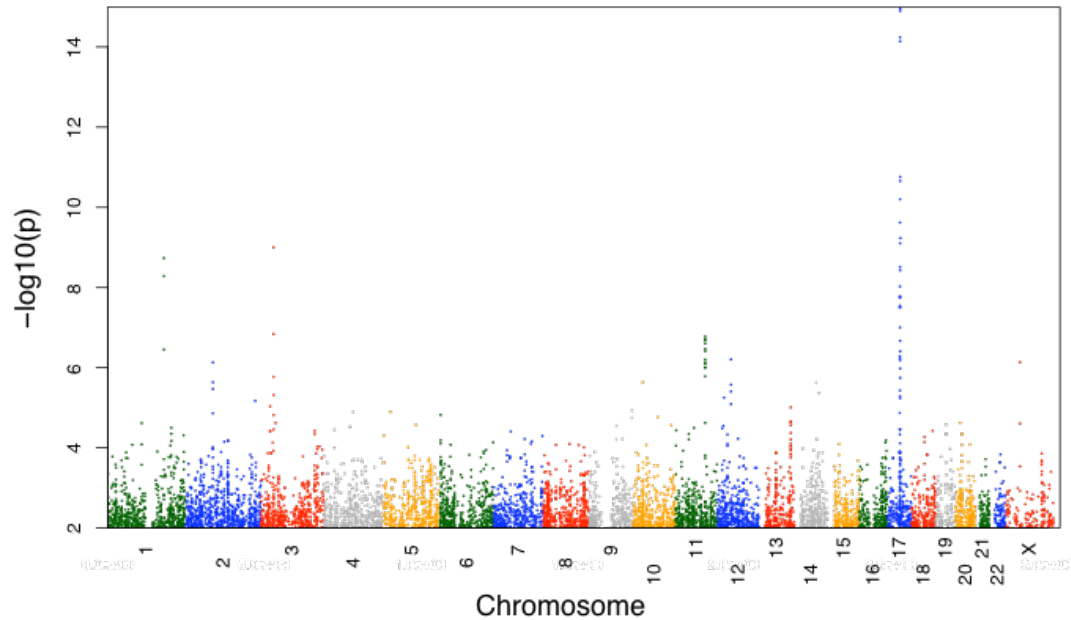

**Supplementary Figure 4.** Manhattan plot showing results for PSP data for subjects of European ancestry. Note that the vertical axis is truncated at 15, corresponding to  $p\text{-value} = 10^{-15}$ , even though P-values for some SNPs in the *MAPT* region of 17p fall well below that value. See Table 2 and Fig. 2, main text, for detailed results from the *MAPT* region.

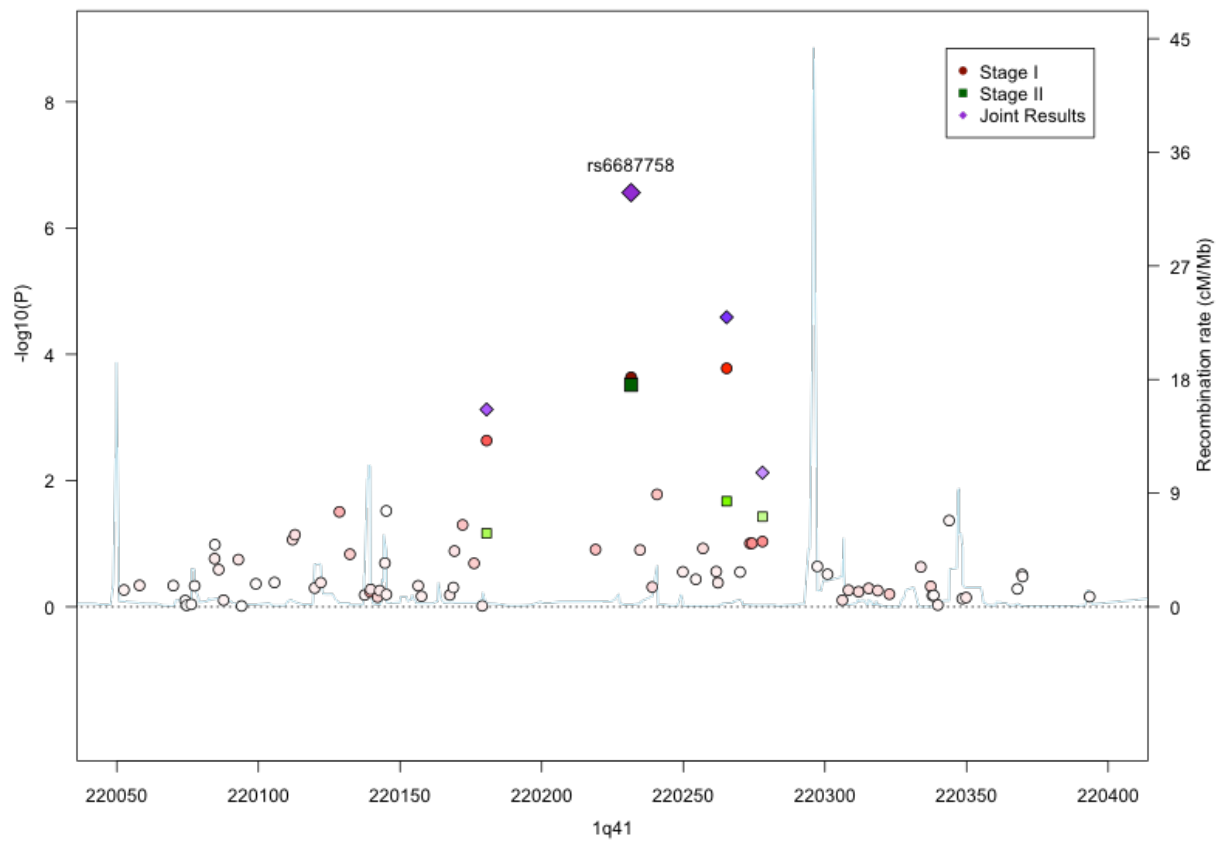

Supplementary Figure 5A.

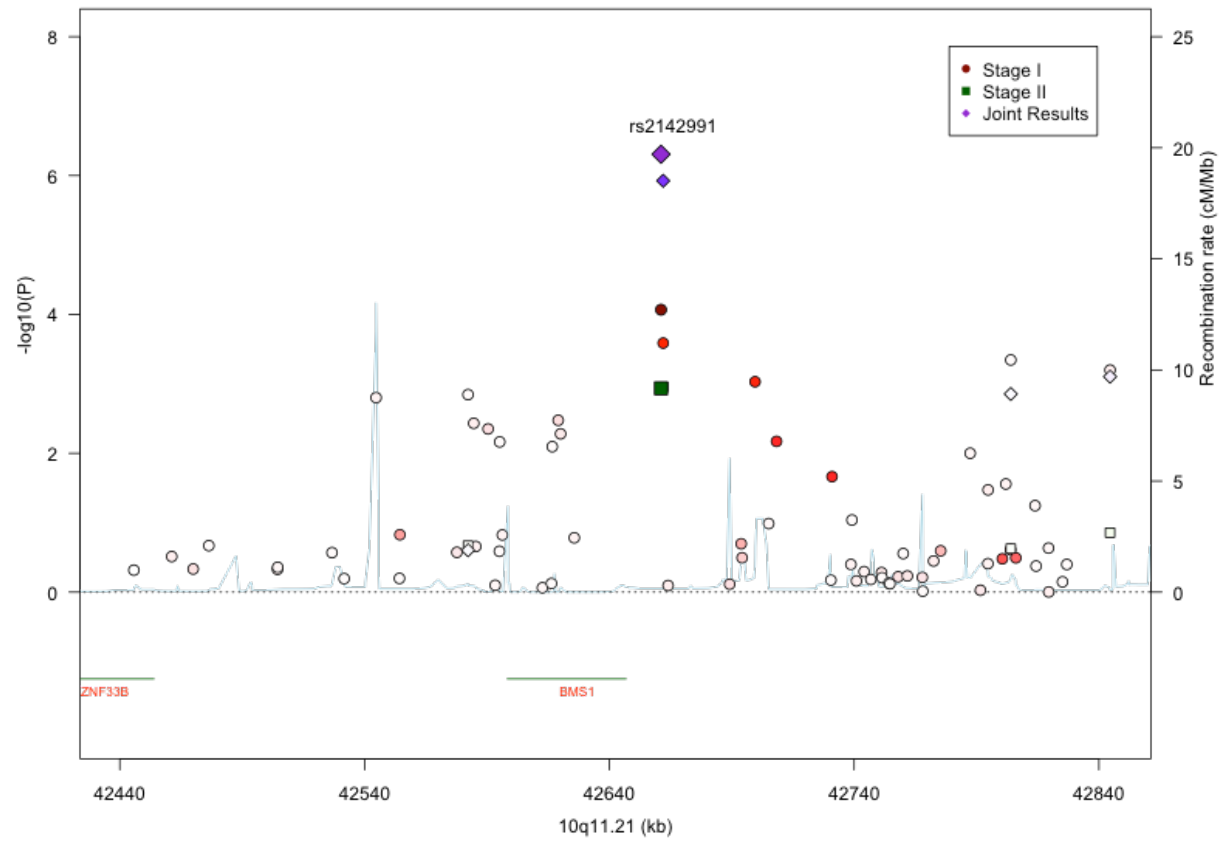

Supplementary Figure 5B.

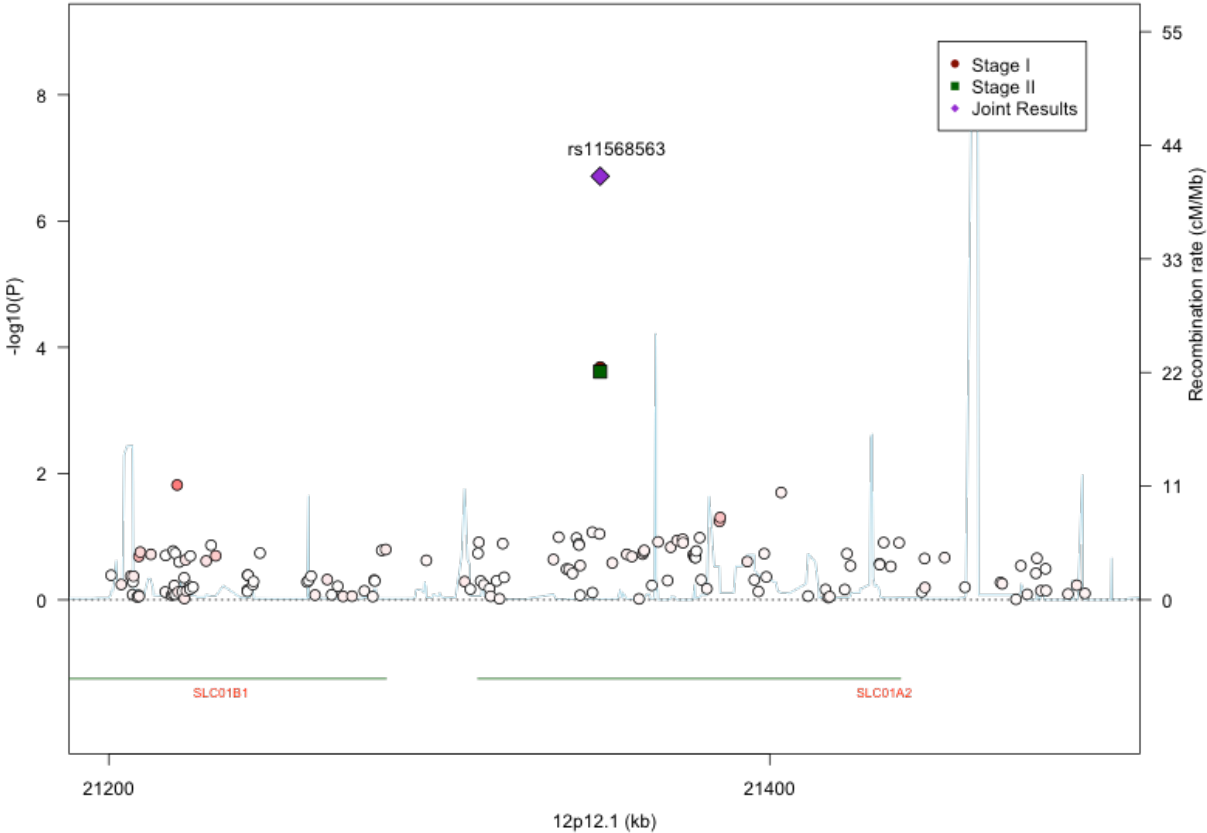

Supplementary Figure 5C.

**Supplementary Figure 5A-C.** Manhattan plots for individual loci with strongly suggestive evidence of association in PSP among subjects of European ancestry. Recombination rate is derived from Hapmap3 data. Linkage disequilibrium (LD), encoded by intensity of the colors, is the pairwise LD of the most highly associated SNP at Stage 1 with each of the SNPs in the region.

### References

1. Imputation of sequence variants for identification of genetic risks for Parkinson's disease: a meta-analysis of genome-wide association studies. *Lancet* 377, 641-9 (2011).
2. Seshadri, S. et al. Genome-wide analysis of genetic loci associated with Alzheimer disease. *JAMA* 303, 1832-40 (2010).
3. Harold, D. et al. Genome-wide association study identifies variants at CLU and PICALM associated with Alzheimer's disease. *Nat Genet* 41, 1088-U61 (2009).
4. Lambert, J.C. et al. Genome-wide association study identifies variants at CLU and CR1 associated with Alzheimer's disease. *Nat Genet* 41, 1094-9 (2009).
5. Naj, A.C. et al. Common variants at MS4A4/MS4A6E, CD2AP, CD33 and EPHA1 are associated with late-onset Alzheimer's disease. *Nature Genetics* 43, 436 - 441 (2011).
6. Hollingworth, P. et al. Common variants at ABCA7, MS4A6A/MS4A4E, EPHA1, CD33 and CD2AP are associated with Alzheimer's disease. *Nature Genetics* 43, 429 - 435 (2011).
